# Supplementary material for: A blend of stretching and bending in nematic polymer networks
Source: Royal Society of Chemistry journal article supplement (doi:10.1039/d0sm00642d), 2020-01-01
Supplement: d0sm00642d1.pdf [file d0sm00642d1.pdf]

There is no supplementary information available for this article.
